# Basal Ganglia Control of Reflexive Saccades: A Computational Model Integrating Physiology Anatomy and Behaviour

Alex J. Cope<sup>1,2,3\*</sup>, Jonathan M. Chamber<sup>1,2</sup> Tony J. Prescott<sup>1,2,3</sup> Kevin N. Gurney<sup>1,2,3</sup>

**1** Department of Computer Science, University of Sheffield, Sheffield, South Yorkshire, UK

**2** Department of Psychology, Adaptive Behaviour Research Group, University of Sheffield, Sheffield, South Yorkshire, UK.

**3** Sheffield Robotics, Sheffield, South Yorkshire, UK

\* a.cope@sheffield.ac.uk

## Abstract

It is hypothesised that the basal ganglia play a key role in solving the problem of action selection. Here we investigate this hypothesis through computational modelling of the primate saccadic oculomotor system. This system is an excellent target for computational modelling because it is supported by a reasonably well understood functional anatomy, has limited degrees of freedom, and there is a wealth of behavioural and electrophysiological data for model comparison. Here, we describe a computational model of the reflexive saccadic oculomotor system incorporating the basal ganglia, key structures in motor control and competition between possible actions. To restrict the likelihood of overfitting the model it is structured and parameterised by the known anatomy and neurophysiology along with data from a single experimental behavioural paradigm, then validated by testing against several additional behavioural experimental data without modification of the parameters. With this model we reproduce a range of fundamental reflexive saccadic results both qualitatively and quantitatively, comprising: the distribution of saccadic latencies; the effect of eccentricity, luminance and

fixation-target interactions on saccadic latencies; and the effect of competing targets on saccadic endpoint. By investigating the model dynamics we are able to provide mechanistic explanations for the sources of these behaviours. Further, because of its accessibility, the oculomotor system has also been used to study general principle of sensorimotor control. We interpret the ability of the basal ganglia to successfully control saccade selection in our model as further evidence for the action selection hypothesis.

## 1 Introduction

Saccades are ballistic eye movements that direct visual attention to putative targets of interest. Given the primacy of vision as a sensory modality in humans, saccades are clearly essential for our goal-directed behaviour. Reflexive saccades are elicited by the phasic appearance of targets peripheral to the current fixation, and are to be contrasted with voluntary saccades which are under cognitive control via, say, verbal instruction or memory recall [1].

The selection of targets for saccade generation in the oculomotor system is a good target for computational modelling for several reasons. First, the behavioural output may be characterised with only three degrees of freedom (dof), of which we are often only interested in two (for horizontal and vertical saccades). This is to be contrasted with upper limb movement, say, which has seven dof (or many more if we work at level of the musculature) [2]. Second, there is a wealth of behavioural data characterising saccades - see for example, [3–6] - which has simple interpretation because of the 2-dof constraint. Often this data takes the form of reaction time and/or saccade location to stimulus onset in simple paradigms with one or two targets. Third, the anatomy of the neural substrate is particularly well understood [7, 8] offering the opportunity for modelling with biologically plausible architectures. Finally, there is a corresponding abundance of electrophysiological data from single unit recordings in awake behaving monkeys [9] which facilitates model constraint and validation.

The basal ganglia (BG) have been implicated in the ‘action selection’ problem [10, 11]: how out of several competing possibilities for action an animal cleanly chooses the best option. Holistically the BG sits in the centre of the oculomotor system, receiving input directly from the terminal retinatopic regions of the cortex, the Frontal

Eye Fields (FEF), and indirectly from the retinatopic brainstem regions of the superior 25  
colliculus. The BG output inhibits circuits to shape the buildup of neural activity in 26  
both of these regions. The BG is clearly positioned to act as a central switch for action 27  
selection in the oculomotor system. However, superficially it may seem that this 28  
problem is divorced from simple reflexive saccade tasks, where often there is only a 29  
single target and thus a single option for action. However, electrophysiological studies 30  
have shown activity patterns in the BG during such tasks that imply a role for the BG 31  
in their performance. Despite extensive modelling work focusing on this part of the 32  
brain (Girard REFS) the influence of the BG on reflexive saccades has not been 33  
explored. Here we investigate this relationship through computational modelling. 34

In our previous work we described a simple computational model of the BG as an 35  
action selection system in isolation [11, 12], and this work has been used as the basis of 36  
more extensive models of oculomotor function [13] exploring predominantly voluntary 37  
saccadic tasks that require cognitive competencies. Here we instead focus on the role of 38  
the BG in purely reflexive saccades, where the eye moves to fixate targets with abrupt 39  
onsets. This reduced scope allows us to create a model without prefrontal cortical 40  
regions, instead focusing on the better characterised sensory cortical and subcortical 41  
areas. One important principle in building our model is to facilitate validation of the 42  
model. This is undertaken using a two stage process, with the experimental evidence 43  
divided into two sections - one for fitting the model, after which all parameters are fixed 44  
- and one for testing the model without alteration of the parameters of the model, but 45  
instead simply providing different visual inputs. The first section of evidence includes 46  
anatomical and electrophysiological evidence, along with a single behavioural task. The 47  
second section contains further behavioural tasks. It would not be expected that the 48  
model would reproduce the second section of data using parameters derived from the 49  
first, and this therefore provides a strong test of the validity of the model, contingent 50  
upon the tasks being suitably distinct between the sections. The relationship of the 51  
model presented here to other models in the literature will be explored in the Discussion. 52

## 2 Methods

53

### 2.1 Model overview

54

In the Introduction we outlined that the modelling process we undertook contained two stages. Our model demonstrates reflexive saccades, and as such we are replicating data with many repetitions in which there is no learning, or any learning will have reached a steady state. Therefore we have no learning processes in the model, and the structure and parameters of the model are not subject to change once they have been set. Thus, we have a first stage of modelling in which we describe the structure of the model based upon the neuroanatomy and functional roles of the brain regions involved in reflexive saccades, and set parameters based on neurophysiological data, along with a single behavioural experiment. These parameters are then fixed for the second stage of the modelling process, where we validate the performance of the model against additional behavioural experiments using the parameters derived solely from the first stage.

55

56

57

58

59

60

61

62

63

64

65

The functional architecture of our model is constrained by the known anatomy and physiology of the oculomotor system [14] and includes: basal ganglia (BG), thalamus, superior colliculus (SC) and frontal eye fields (FEF). The macroscopic connectivity is shown in Fig 1. The form of the architecture is close to that described by N'Guyen et al [13].

66

67

68

69

70

As noted in the Introduction, our perspective here focuses on the basal ganglia and their role in action selection. The basal ganglia are connected in closed looped circuits with cortex, via thalamus [15–17], and also form loops with sub-cortical circuits [18]. Their outputs are tonically active and inhibitory, and selection is achieved by selectively releasing inhibition on cortico-thalamic or subcortical targets that encode specific actions [19].

71

72

73

74

75

76

Under the action selection hypothesis developed by Redgrave et al. (1999), each action is encoded in neural representations throughout a loop with basal ganglia; we refer to the anatomical substrate for each action encoded in this way as an *action channel*, or simply a ‘channel’. The strength of the input into these channels is termed the *saliency* of the action represented by that channel. A high saliency indicates that an action is more behaviourally relevant in the current context, and a low saliency indicates that an action is less behaviourally relevant. In simple models of basal ganglia and

77

78

79

80

81

82

83

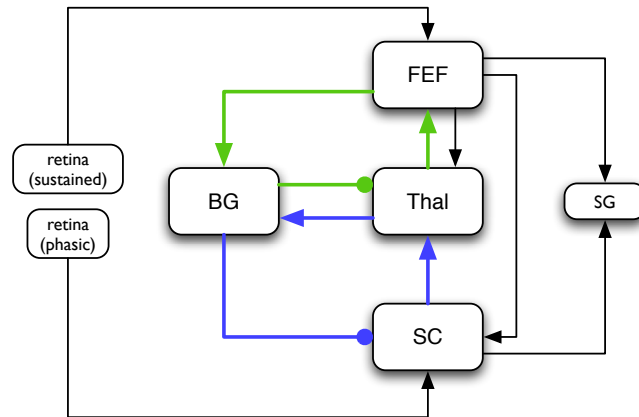

**Fig 1. The macroscopic architecture of the model.** The main nuclei modelled as brain systems are: basal ganglia (BG), frontal eye fields (FEF), thalamus (Thal), and superior colliculus (SC). Other components include the retina (providing sustained and phasic input) and the saccadic generator (SG) (motor output) which are not modelled in a biologically plausible way. The loops through basal ganglia, defining the architecture, are shown by coloured lines: the cortical loop (through FEF and Thal) in green, and the sub-cortical loop (through SC and Thal) in blue. Connections with arrowheads/filled circles indicate excitatory/inhibitory connections respectively.

cortico-thalamic loops, these channels comprise discrete, non-overlapping  
circuits [11, 12, 20]. We will have need to finesses this scheme in the current model, as  
described in section 2.2. Nevertheless, in broad terms, release of inhibition from basal  
ganglia to the thalamo-cortical or subcortical target in a channel allows activity in the  
target to build up and eventually reach a threshold, thereby allowing behavioural  
expression of the corresponding action.

In the oculomotor circuit, there are two principal loops through basal ganglia: a  
cortical loop originating in FEF [17], and a subcortical loop originating in SC [18]: see  
Fig 1. The FEF and SC are described in more detail below, but in the meantime, we  
note that, their respective loops with basal ganglia interact within a complex of  
thalamic nuclei, linking the FEF, SC, and the basal ganglia [21]. In addition the FEF  
innervates SC [22] and both FEF and SC control the saccadic generator (SG) in the  
brainstem which operate the musculature surrounding the eye to produce saccades [23].

Several regions of the brain that are associated with eye movements have been  
omitted from this model. Thus, the early visual processing stream in cortex, from V1  
through to the lateral intraparietal region (LIP) (which then innervates FEF), has been  
subsumed into a ‘sustained retinal’ signal. Our rationale here is that we are interested  
in phenomena surrounding saccades to simple luminance targets which do not require

---

the detailed feature extraction and analysis performed by these visual areas. Another 102  
region of cortex that is closely linked with eye movements is the supplementary eye 103  
fields (SEF) [24]. However, the SEF are involved only in the programming of sequences 104  
of saccades [25] and memory guided saccades [26–28]. Visually guided saccades, which 105  
are our remit here, are unaffected by lesion of SEF [29] and so we therefore omit them. 106

At the neuronal level, the model uses rate-coded *leaky integrator* units to represent 107  
small populations of neurons [30]. In brief, each unit uses a weighted sum of its inputs 108  
as the forcing term in a first order dynamical equation with a state variable we call the 109  
*activation*  $a$ , 110

$$\tau \frac{da}{dt} = -a + \sum_i w_i x_i \quad (1)$$

where  $\tau$  is a time constant. This activation is used, in turn, as the input to a piecewise 111  
linear transform with saturation to form the final output, thereby constraining the 112  
output between 0 and 1, 113

$$y(a) = \begin{cases} 0 & a \leq \epsilon \\ a - \epsilon & \epsilon < a < 1 + \epsilon \\ 1 & a > 1 + \epsilon \end{cases} \quad (2)$$

Here,  $\epsilon$  defines an offset to simulate (if positive) the effect of tonic activity or (if 114  
negative) a threshold above which activity must rise for there to be an output. The 115  
exception to this rule is the STN which has an exponential output function which better 116  
approximates its physiology [31]: 117

$$y(a) = e^{(a-0.9)} \quad (3)$$

The model as a whole comprises assemblies of these units in each nucleus. Each 118  
assembly is referred to as a ‘layer’ since, in all cases, there is a retinatopically defined 119  
spatial organisation defined by a 50-by-50 unit array (see Fig 3). Connections between 120  
layers comprise a variety of topographic connection schemes, and can be normalised by 121  
dividing each weight by the sum of all weights in the connection. We now turn to a 122  
more detailed description of component sub-systems, starting with the most complex – 123  
the basal ganglia. 124

---

## 2.2 Basal Ganglia

Our instantiation of basal ganglia is based around our previously published model (Fig 2)

[11, 12] which will be henceforth referred to as the *GPR model*. This model incorporates the following main components of the primate BG [32, 33]: (i) The striatum – the main input station to the BG – which is divided into two interdigitated populations of projection neurons expressing primarily D1 or D2 type dopaminergic receptors (termed *SD1* and *SD2* respectively here); (ii) The subthalamic Nucleus (STN); (iii) the external segment of the globus pallidus (GPe); (iv) the output nucleus relevant for saccadic control – the substantia nigra pars reticulata (SNr) [14]

The connectivity of the GPR model (Fig 2) is constrained by the known anatomy and physiology of the BG [34]. Physiologically, the only source of glutamate within BG is the STN whose projections are therefore excitatory; all other nuclei have GABAergic projection neurons and are therefore inhibitory. The cortex sends glutamatergic projections to both the *SD1* and *SD2* populations in striatum which, in turn, project preferentially to the SNr, and GPe respectively [35]. The cortex also projects to the STN which sends diffuse projections to the SNr and GPe [36]. The GPe, in turn, projects to the SNr and to the STN.

Within BG, there are several mechanisms supporting competitive processing for selecting channels whose inhibitory output is reduced. The selection mechanism of the GPR model is the ‘off-centre, on-surround’ scheme proposed by Mink and Thach (1993). Here, the STN provides diffuse excitation (the ‘on-surround’) to the SNr, and the *SD1* neurons in striatum provide focussed inhibition (the ‘off-centre’) to SNr. This arrangement leads to selection behaviour via release of target inhibition, since channels that have strong salience (input) have weak output at the level of SNr, and channels with weak salience have enhanced output.

The GPe is not included in the centre-surround circuit described above but still plays an key role in selection. Thus, the diffuse projection from STN can, if unchecked, cause massive excitation within each channel of SNr (since each one receives input from all STN channels). Gurney et al [11, 12] showed that the inhibitory feedback from GPe to STN acts as an ‘automatic gain control’ to help prevent this.

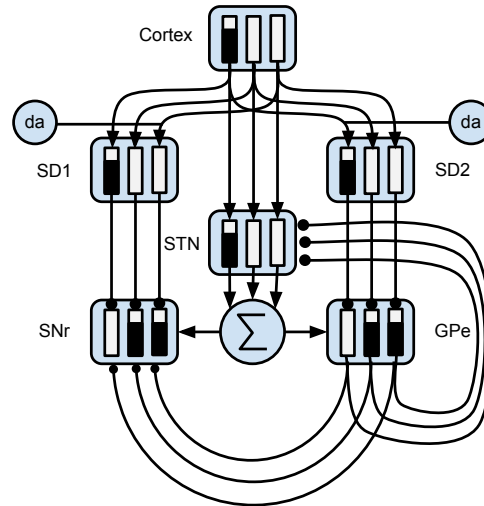

**Fig 2. The basal ganglia model component.** Connections with arrowheads/filled circles indicate excitatory/inhibitory connections respectively. The circles labeled ‘da’ provide dopaminergic influence on the inputs to the striatum (SD1 and SD2). Three action channels are shown to illustrate the selection mechanism. The small bar-graphs within each nucleus indicate the level of activity within each channel therein. For example, the channel indicated by the leftmost bar has a high salience (cortical input). The diffuse projection from STN is indicated by the summation symbol (diffuse projection is equivalent to summing channel-wise projections and dispersing focally

At the neuronal level, the STN, GPe and SNr have tonic output levels [19, 38, 39].  
This is modelled using piecewise linear output functions with positive offsets  $\epsilon$  (see  
equation 2). In striatum, SD1 and SD2 have negative offsets mimicking the so-called  
‘down-state’ of medium spiny neurons which have a resting potential far below spiking  
threshold and require massive co-ordinated input to generate action potentials [40]. In  
addition the SD1 and SD2 neurons are influenced by dopamine in different ways. Our  
model incorporates the neuromodulatory effects of dopamine, which has a  
predominantly facilitatory effect on cortico-striatal transmission at medium spiny  
neurons with D1 receptors [41, 42] and an inhibitory effect on those with D2  
receptors [43]. This is modelled by multiplying the cortico-striatal weights by factors of  
 $(1 + d)$  and  $(1 - d)$  for SD1 and SD2 respectively, where  $d$  represents the level of tonic  
dopamine.

The original GPR model had only six channels, with one leaky integrator unit per  
channel in each nucleus, and simple connectivity in which focussed inhibition from  
striatum to SNr and GPe was defined by a simple one-to-one scheme (with a connection  
from each unit in SD1/SD2 to a counterpart in SNr/GPe). In the oculomotor model, we



---

made two modifications to this scheme to incorporate the continuous, topographic (retinatopic) connectivity required. First, each nucleus is comprised of a layer of leaky integrator units arranged into a two-dimensional grid of 50 by 50. Here, each unit represents the activity associated with a corresponding spatial location in the visual field. Second, the connections from striatum to SNr and GPe were defined by projective fields with many weighted connections. Specifically, each unit in SD1 projected to a counterpart  $SNr_j$  in SNr with some weight  $w_{max}$ , but also connected to neighbouring nodes in SNr with a weight given by  $w_{max}G(d)$ , where  $G(d)$  is a circularly symmetric, 2D-Gaussian which is a function of distance  $d$  from  $SNr_j$  (see Fig 3). A similar scheme applied with respect to SD2 and GPe. In addition the strength of the excitatory outputs from the STN were decreased in comparison with their GPR counterparts.

### 2.3 Loops through basal ganglia with frontal eye fields and superior colliculus

The Frontal Eye Fields (FEF) are a key cortical area for the generation of saccadic eye movements [14, 25, 44, 45]. Saccadic targets are mapped retinatopically over the surface of FEF [44–46], and increased neural activity at a location in the map precedes a saccade to that location. Importantly, the FEF is also associated with visual decision making [47–50]. Thus, in a saccade choice task, increased FEF activity is predictive of the eye movement whether correct or incorrect [51], rather than the correct response. Remarkably, this prediction is reliable with a sampling of fewer than 7 neurons or trials [52].

FEF neurons can be divided into three functional groups, related to whether their activity corresponds with visual stimuli, motor action, or both [22]. Here we simplify this categorisation using a single layer of 50 by 50 units representing the mean of all three groups. This layer therefore responds to both visual stimuli and the buildup of activity associated with motor (saccadic) action. The retina provides a persistent luminance signal into the FEF through the dorsal visual pathway [53] which is abbreviated in our model to a direct connection with delay.

The FEF provides input into the BG [54] (at SD1, SD2, STN - see Fig 3) which, in turn, projects back to thalamus in a retinatopically organised way, [17, 55]. In addition

---

the thalamic targets of this path are regions with strong reciprocal connections to the 202  
FEF [56]. In this way the FEF forms channel-based loops through basal ganglia of the 203  
kind described above. Such circuits formed the basis the model of Humphries and 204  
Gurney [20]. In that model, the thalamic component included the thalamic reticular 205  
nucleus which implemented an additional selection mechanism (via a feed-forward 206  
competitive network within the cortico-thalamic loop). However, in the interests of 207  
model simplicity, this was not implemented in our oculomotor architecture. 208

The multiplicity of feedback loops through thalamus, cortex and basal ganglia can 209  
develop complex behaviour. In particular the thalamo-cortical loop may be thought of 210  
as an integrator, or accumulator of information whose ‘gain’ is modulated by inhibition 211  
from basal ganglia [57,58]. To understand how this modulation occurs mechanistically, 212  
we note two things: first evidence that projections from SNr form synapses proximal to 213  
the soma at thalamic neurons [59]; second, that proximal inhibition often acts to 214  
multiplicatively gate (and *in extremis* veto) excitatory currents originating more 215  
distally [60]. While such a gating effect has its origin in the complexities of neural 216  
membrane dynamics, we model it phenomenologically. Thus, let  $x_{BG}$ ,  $x_{Ctx}$ , be the level 217  
of basal ganglia and cortical inputs, respectively, to thalamus, and  $w_{BG}$ ,  $w_{Ctx}$  the 218  
associated synaptic weights. Then inhibition from basal ganglia can act in a gating 219  
manner on cortical input if the net input,  $u$ , to thalamus is given by 220

$$u = w_{Ctx}x_{Ctx}(1 - w_{BG}x_{BG}) \quad (4)$$

However, projections from SNr to the thalamus synapse both proximally *and* 221  
distally [59] on the dendritic arbor, and so we might expect a mix of gating and additive 222  
effects. Therefore, we also incorporate additive connections to thalamus from basal 223  
ganglia. 224

The superior colliculus (SC) is a sub-cortical nucleus which also plays a critical role 225  
in the generation of saccades [61]. Both FEF and SC have direct connections to the 226  
saccadic generator (SG) and if either is lesioned the other can direct gaze following a 227  
period of adjustment [62], albeit with some persistent deficits. The SC is also a direct 228  
target of output from the SNr [63,64], and thus can be influenced by the action selection 229  
mechanisms of the basal ganglia. In particular, it forms a loop with basal ganglia but, 230

---

unlike its cortical counterpart in FEF, the input to basal ganglia goes via the thalamus. 231

While the SC has seven alternating cell and fibre rich layers [65], in most cases these 232  
are divided into the ‘superficial’ and ‘deep’ layers, which have significantly different 233  
response properties. Cells in the superficial layers are mainly visually responsive, with a 234  
preferred response to phasic events (luminance onsets and offsets) and movement on the 235  
visual field [66], and receive input from the retina. In contrast, cells in the deep layers 236  
receive multimodal input, including inhibitory input from the output structures of the 237  
BG [63], and are directly involved in the generation of saccadic eye movements. Saccade 238  
related activity in the deep layers appears to generate saccades through ‘population 239  
coding’, with a weighted sum of activity across the retinotopy of SC determining the 240  
saccade target [67–69]. The deep layers of SC receive input from the FEF in a 241  
topographic manner [70,71] 242

We base the SC in our architecture on the model proposed by Arai et al [72]. In 243  
their model influence on the SC from the SNr was implemented as a global, rather than 244  
‘channel-based’ signal, that projected to all regions of SC with equal strength; selection 245  
of saccade target was mediated by long range inhibitory mechanisms in SC rather than 246  
SNr. In a more recent version of the model Arai and Keller (2005) removed the intrinsic 247  
inhibitory connections from SC and - in response to new evidence - modelled SNr input 248  
to the SC with a coarse topography, thereby allowing SNr to shape selection at a given 249  
location. However, unlike our model, Arai and Keller hand-crafted the activity in their 250  
SNr input to test a specific hypothesis regarding the role of multiple locus selection in 251  
explaining saccade curvature. The Arai and Keller (2005) model of SC has superficial 252  
and deep layers which we incorporate here. Each of these layers in our model is a two 253  
dimensional array of 50 by 50 leaky integrator units, and as in the FEF is arranged in a 254  
retinatopic manner [65]. 255

Consideration of the effect of fixation activity on the model, uncovers a 256  
computational problem. Due to its large extent, the foveal region provides a strong 257  
saliency signal to the BG which could produce sufficient disinhibition to cause saccades. 258  
While a peripheral target may ultimately compete successfully with the fovea and 259  
generate a saccade, this process would cause a significant delay in producing this 260  
saccade, leading to latencies much larger than those observed experimentally. In order 261  
to prevent such erroneous behaviour, we cannot simply prevent saccades close to the 262

---

fovea, as this still allows strong thalamo-cortical loop activity in the foveal representation, which could potentially still be problematic.

A clue to how to proceed is supplied by data showing constant fixation activity in the FEF [22]. This implies that it may not be cortical activity at the fovea which is of concern, but rather, its facilitatory influence downstream. Thus, we suggest a mechanism whereby the synaptic strength of the connections between the FEF, and thalamus and striatum, are reduced closer to the fovea. This is done by multiplying the cortico-fugal weights by a factor  $k(r)$ , where  $r$  is the radial distance from the fovea in pixels (see the following section for details). Thus,

$$k(r) = \frac{1}{2}(\tanh [0.5(r - R) + 5] + 1) \quad (5)$$

where,  $R$  is the radius of the neural layer (in pixels). The relation is ‘S-shaped’ normalised to the range [0 1].

## 2.4 Input and output: retina and saccade generation

Input to the model is provided through a simple retina model which directly samples a larger ‘world array’ of pixel values. This input goes directly to FEF via a 50 ms delay, intended to model the passage time through the dorsal visual stream. In this way, FEF provides a sustained response to long lasting visual stimuli. Regions such as the LIP are compacted into this delay, as evidence suggests that while FEF activity is strongly correlated with saccade decisions, LIP activity is not. We therefore assume that accumulation of activity in LIP is a result of the feedback from FEF, where the decision is actually formed. We must also address the lack of motion and other processing in the FEF input. These are omitted as the information is processed in regions which are not on the direct path from the retina to the FEF, and as such will incur greater delays to the information arriving at the FEF. Since decisions are made with low latencies in reflexive saccades we therefore omit this information and simply use the luminance information which can be transmitted most efficiently to the FEF.

In contrast, the SC has a low latency, phasic, response to luminance onset and offset [65]. To capture this phenomenon, we introduce a pair of 50-by-50 leaky integrator unit layers with different membrane time constants, and with the more slowly reacting

---

layer inhibiting its faster counterpart. Both layers take input from the ‘world array’, and  
the faster layer responds quickly to the appearance of a prolonged stimulus before it is  
inhibited by the slow layer, forming a phasic response to the stimulus onset; this is then  
sent to superficial layer of the SC. It should be noted that we do not assert that this is  
an entirely separate pathway from the retina to the SC, but simply that tonic responses  
are not found in the SC superior layers, and it is this feature we seek to reproduce.

The retina processes images from a Cartesian ‘world array’ (Fig 3) and, in doing so,  
captures the nonlinear topographic mapping from image space to its representation in  
areas like SC and FEF, in which the fovea (central region around point of gaze) is  
represented much more densely than the periphery. This is due to inhomogeneity of  
representation in retina and its subsequent projections to target areas like cortex [74].  
However we subsume all such transformations using a single cortical magnification  
factor (CMF) defined by a function  $M(E)$  of the visual eccentricity  $E$ . We adopt the  
form for  $M(E)$  in [75]

$$M = \frac{M_F}{1 + \frac{E}{E_2}} \quad (6)$$

Where  $M_F$  the foveal magnification, and  $E_2$  is the eccentricity at which the  
magnification factor has changed by a factor of 2. There are a range of experimentally  
measured values for  $E_2$ , mostly between  $0.1^\circ$  and  $4^\circ$  [76]; we chose a value of  $2.5^\circ$ .

We now turn to the motor output; saccade generation. While there are several  
biologically realistic neural models of the saccadic generator (SG), their use would  
require the crafting of appropriate weights from the topographic array of SC neurons to  
SG. This in turn requires a learning phase which, given the time required to compute a  
single saccade in the model, would be prohibitively lengthy. Instead, we make use of a  
simple interpretation of the retinatopic arrangement of SC to determine the putative  
saccade position. Here, we first transform the retinatopic organisation of the SC to  
Cartesian co-ordinates, and then compute the centroid of the activity of the SC deep  
layers. The position of this centroid in the Cartesian frame determines the saccadic  
position. This mechanism has previously been used in the target acquisition model  
of [77].

The production of clean saccades, free from artefacts, is dependent on precise signal  
timing. In particular, it depends critically on the cessation or ‘quenching’ of target

---

representations after a saccade has been made. Thus, suppose the target representation 321  
in FEF is not quenched rapidly enough after a saccade towards the spatial location it 322  
originally indicated. The residual activity will indicate a new, spurious target position, 323  
bearing the same relation to the new foveal representation as its previous counterpart. 324  
This activity, if expressed strongly enough, has the potential to cause a saccade to the 325  
new ‘phantom target’, as it were. In extremis, the complete failure to reduce the target 326  
activity in FEF can result in a rapid succession of so-called ‘staircase saccades’. This is 327  
not simply a theoretical construct; it can be induced by electrical stimulation of the SC, 328  
and is found as a symptom in Parkinson’s patients [78–81]. 329

To correct this pathology requires a post-saccadic inhibition of the target location. 330  
Such a ‘reset’ signal is available via re-entrant (i.e. feedback) connections from the 331  
brainstem to the FEF and SC, ’ [82]. Experimental evidence shows the effect of this 332  
signal is suppression following visual activity that evokes a saccade, but not following 333  
sub-saccade threshold visual activity. 334

In addition we suppress all visual input from the target during the saccade, to model 335  
the phenomenon of ‘saccadic suppression’ [83]. Since we do not model the mechanics of 336  
the eyeball, our saccades are nominally of zero duration (we are not interested in the 337  
current model in the dynamic profile of saccades themselves, but rather, their 338  
initiation). However, we suppress visual input for 10ms to mimic the finite duration of 339  
visual suppression accompanying a saccade. 340

## 2.5 Model parameterisation and detail 341

Now we describe in detail the parameters set in the model. These are determined by 342  
tuning the model to perform a simple saccadic task, in which a fixed luminance point is 343  
fixated by the model. After a fixed duration (since our model cannot learn the timing) 344  
the fixation point is extinguished, and simultaneously a target point of fixed luminance 345  
is presented. The *saccadic latency* between presentation of the target and the initiation 346  
of an eye movement is measured and averaged. We tune the model to match this to 347  
experimental data, while also matching the electrophysiological evidence of activity in a 348  
variety of brain regions. More details are provided in the Results section. It should be 349  
noted that the tuning of the BG portion of the model attempts to preserve as closely as 350

possible the weights used in the original paper. 351

Fig 3 shows the detailed model structure highlighting several of the features 352  
described above (and not apparent in the macro-scale diagram of Fig 1). Projection 353  
schemes are one of several varieties: Gaussian spread of weights (see section: Basal 354  
ganglia), one-to-one, all-to-all, or normalised in which the sum of all weights in the 355  
connection is one. As detailed in the previous section, for the input to the Striatum the 356  
weights diminish gradually towards the fovea. All layers have noise applied to the 357  
activation level of each neuron (Gaussian,  $\sigma = 0.01$ ) at each time step of the simulation, 358  
except the retinal and world layers. 359

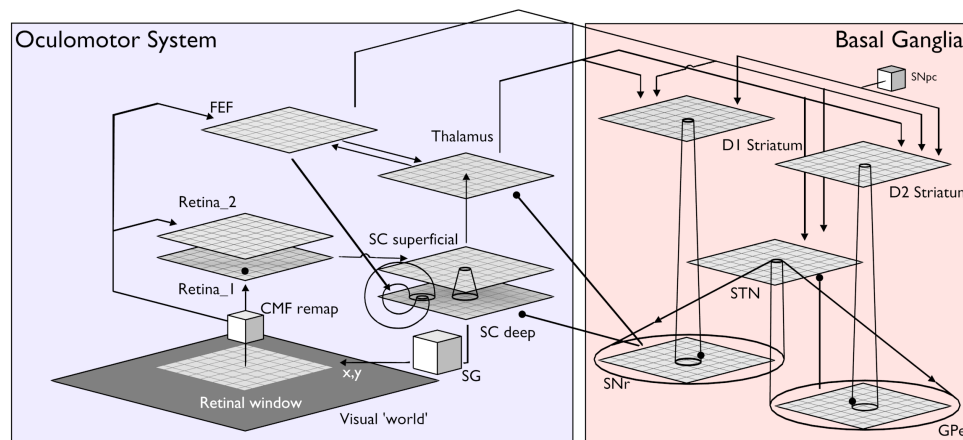

**Fig 3. The detailed architecture of the model.** Connections with  
arrowheads/filled circles indicate excitatory/inhibitory connections respectively. Conic  
section between layers represent spatial patterns of connectivity weights governed by 2D  
Gaussians, and cones covering the entire target layer represent all-to-all connection  
patterns. Cubes represent components that are not implemented in a biological manner.  
The retinal layers 1 and 2 correspond to the ‘faster’ and ‘slower’ reacting layers  
respectively. They receive an input from a window on the world array, the location of  
which is determined by the current eye co-ordinates from the saccadic generator (SG).  
All other abbreviations are described in the text.

The parameters for each layer are shown in Table 1 360

### 3 Results 361

One of our aims is to discover the mechanistic explanation of a range of reflexive 362  
saccadic *behaviours*, together with the *neural responses* found in the oculomotor system 363  
during saccade production. To this end, we investigated several kinds of stimulus 364

| Layer name     | $\tau$ (s) | $\epsilon$ | dims             | connects to:   | weight | type              |
|----------------|------------|------------|------------------|----------------|--------|-------------------|
| World          | -          | -          | $300 \times 300$ | Retina(fast)   | 1.2    | G, $\sigma = 1.0$ |
| Retina(fast)   | 0.01       | 0          | $50 \times 50$   | SC superficial | 2.0    | 1-2-1             |
| Retina(slow)   | 0.03       | 0          | $50 \times 50$   | Retina(fast)   | -1.2   | 1-2-1             |
| SC superficial | 0.01       | 0          | $50 \times 50$   | SC deep        | 10.0   | G, $\sigma = 0.6$ |
| SC deep        | 0.01       | 0          | $50 \times 50$   | Thalamus       | 0.6    | 1-2-1             |
| FEF            | 0.01       | 0          | $50 \times 50$   | Thalamus       | 3.0    | 1-2-1             |
| Thalamus       | 0.01       | 0          | $50 \times 50$   | FEF            | 0.5    | 1-2-1             |
| SD1            | 0.01       | -0.05      | $50 \times 50$   | SNr            | -1.0   | G, $\sigma = 1.5$ |
| SD2            | 0.01       | -0.05      | $50 \times 50$   | GPe            | -1.0   | G, $\sigma = 1.5$ |
| STN            | 0.005      | E          | $50 \times 50$   | SNr            | 2.4    | a-2-a, n          |
| GPe            | 0.01       | 0.0        | $50 \times 50$   | SNr            | -0.4   | 1-2-1             |
| SNr            | 0.01       | 0.0        | $50 \times 50$   | Thalamus       | -2.5   | 1-2-1, m          |
|                |            |            |                  | SC deep        | -5.0   | 1-2-1, m          |
| SG             | -          | -          | -                | FEF            | -0.4   | G, $\sigma = 5$   |

**Table 1. Model parameters:** connection strengths, connectivity type, and membrane time constants  $\tau$ . Abbreviations: G; Gaussian projection connectivity with standard deviation of weights  $\sigma$ . 1-2-1, a-2-a; one to one, all-to-all connectivity respectively. n: normalised connectivity (see text). df: connectivity grows weaker at the fovea [see equation \(5\)](#). m: multiplicative synaptic. E: exponential output function (see text) links described in (4).

paradigm, all of which make use of simple luminance stimuli with limited spatial extent (typically small disks of light) [1, 3]. Trials are usually commenced with a *fixation point* and, after a period, the fixation point is extinguished and another point (the *target point* is presented a different location. The time taken from presentation to saccade is the *response time* (RT) or the *saccadic latency*. The paradigms we model look at the several dimensions along which such protocols can be constructed. Some protocols examine the effect of temporal variations in fixation offset and target onset: if the target appears before, simultaneously with, or after, the target offset, we produce so-called *overlap*, *step*, or *gap* stimuli [4]. Other protocols vary the spatial relationship between fixation and target in terms of the visual angle or *eccentricity* between the two [5]. In experiments critical to our aim of examining the role of basal ganglia in action selection, we examine the ability to select between two, simultaneously presented targets [6]. Finally, as well as recording trends of mean RT against independent stimulus variables (like stimulus gap/overlap or eccentricity), much previous research has been directed at uncovering the statistical distribution of RTs for a given parametric setting [3].



### 3.1 Parameterisation: the model can be tuned to account for neural responses during a saccade task

The task was a step-protocol with an isoluminant point fixation (luminance = 0.5 (on a scale from zero to one) and point target (luminance = 0.6, duration 250ms) presented at a fixed retinal eccentricity of eight degrees. The responses of several units in the model were recorded and compared with neural responses recorded from a monkey performing the same task (Fig 4) in order to tune the model parameters. All panels of Fig 4 display an 800ms time window so the duration of changes can be compared across conditions and nuclei. Note that no scaling of simulation time was made to match events in the data; the temporal scale of the dynamics emerges naturally from the model itself.

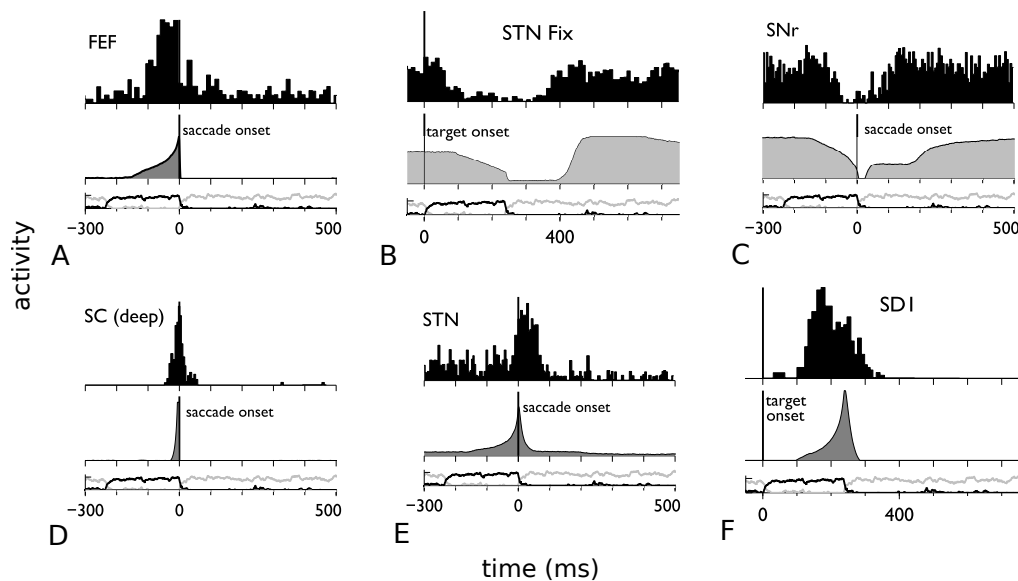

**Fig 4. Data and model comparison at the level of neural responses.** In each panel, peristimulus time histograms (PSTHs) of neural responses in key oculomotor nuclei are compared with comparable model outputs for a step task; the PSTHs are at the top (black area fill) and the model output below (grey area fill). At the bottom of each panel is shown the retinal input at fixation and target as grey and black line plots respectively. All neurons (model and data) have receptive fields (RFs) covering the target location apart from that in B, ('STN fix') which is for STN neurons with RFs encompassing the fixation point. The timings are aligned to saccade or target onset as indicated in each panel and all panels show an 800ms time window. Data were adapted from the following sources: SNr and SC [61]; STN [84]; striatum SD1 [85]; FEF [86]

The results show that the model can produce similar phasic activity increases related to the target stimulus onset in the FEF, SC, STN, and striatum when performing the same task. These increases are associated with a phasic decrease in SNr activity in cells

---

whose receptive field contains the target. Activity in the STN at fixation shows an 393  
initial period of high activity due to the fixation stimulus, then a period of low activity 394  
following the saccade, followed by high activity due to the relocation of the target to 395  
fixation. 396

We now seek to explain these results, and thereby their biological counterparts, in 397  
terms of mechanisms available within the model. Each channel corresponds to a 398  
retinatopic location, and a local luminance stimulus will activate one or more of these 399  
channels, depending on the retinal area it occupies. Just after target onset, the 400  
superficial layer of SC has phasic response to this event, while the FEF starts to 401  
respond to the persistent presence of this stimulus – see Fig 4A. 402

Both FEF and SC provide input to the basal ganglia: the FEF directly, and the SC 403  
superficial layer through a relay in the thalamus. Thus, stimulus activity in FEF and 404  
SC provides retinatopically organised excitatory input to the striatum and the STN. 405  
These inputs start to induce response in STN and SD1 (Fig 4E,F). Note that STN 406  
activity at the target location initially shows a non-zero tonic response which, in the 407  
model, is due to background noise from the FEF; there is no corresponding activity in 408  
the SD1 neurons which are in the down-state). Then, under the off-centre on-surround 409  
circuit described in section 2.2, SD1 starts to *decrease* inhibitory SNr activity for the 410  
target-location channels (4C), while STN causes *increased* SNr output on all others. 411

At the level of the loops with FEF and SC, the SNr sends its inhibition to the 412  
thalamus and the deep layer of the SC so that, decreasing activity on a channel in SNr 413  
disinhibits the corresponding channel in these layers. The deep-layer SC units are more 414  
strongly inhibited than their thalamic counterparts, so the latter responds first. The 415  
thalamus is in an excitatory loop with the FEF, and so disinhibition from the SNr 416  
allows activity in corresponding channels the FEF to increase. This, in turn increases 417  
the input on those channels to the basal ganglia resulting in further disinhibition on the 418  
selected channels. This feedback ‘amplification’ process is evident in the accelerated 419  
rate of change of the signals in FEF, STN, SD1 and SNr (4A,E,F,C). This process 420  
continues until the strong inhibition to the SC deep layer is almost completely removed, 421  
allowing a vigorous phasic response in this layer (4D) which initiates a saccade. 422

Once the saccade has been initiated, the visual input changes, as the saccade has 423  
moved the target to the centre of vision. There is an accompanying rapid decay of 424

---

activity in the STN at the previous location of the target on the visual field. 425

At the foveal fixation point, prior to the saccade, STN receives sustained input from 426  
FEF until the fixation is removed, thereby causing a phasic decrease in STN activity at 427  
this location (4B). During the saccade, the post-saccadic inhibitory mechanisms remove 428  
afferent drive from STN causing its activity to decline. After a delay corresponding to 429  
that in the dorsal stream to FEF, in addition to the saccade duration, the retinal 430  
activity derived from the target at its new (foveal) location occurs, increasing the 431  
activity in STN at that new foveal location. This, in turn, drives SNr activity back up 432  
to fixation levels. 433

### 3.2 Validation: the model accounts for the characteristic 434 pattern of response times for gap, step, and overlap tasks 435

We now begin the process of validating the model by testing a variety of behavioural 436  
experiments that the model has not been tuned explicitly to reproduce. The gap, step 437  
and overlap tasks may be viewed as categories of a single task protocol with variable 438  
temporal gap between fixation and target stimuli [4]. Thus, we conducted experiments 439  
to measure the saccadic reaction time (RT) as we varied the temporal separation,  $\delta t$ , 440  
between fixation offset and target onset over a range of values between -400ms and 441  
400ms. Here, negative and positive values signal overlap and gap tasks respectively, and 442  
 $\delta t = 0$  is a step task (as in the previous section). Luminance and target eccentricity 443  
were constant, as was the duration of the target, and all were the same as those used in 444  
the previous section. 445

The results, together with data from [4], are shown in Fig 5. Note the three 446  
experimental subjects show considerable individual differences in the precise values of 447  
RT, but not on the patterning of the data: there is always a fairly constant set of values 448  
for large negative  $\delta t$ , linearly decreasing values across the step condition ( $\delta t = 0$ ), and 449  
another region of approximate constancy for large positive  $\delta t$ . In respect of these 450  
features, the model results show a similar patterning to the data. 451

In order to explain this pattern of results, we examined the behaviour of several 452  
neuron types in the model for a gap of 300ms, a step, and an overlap of 300ms (Fig 6) 453

The three plots are aligned at the target stimulus onset ( $t = 0$ ), and the saccade 454

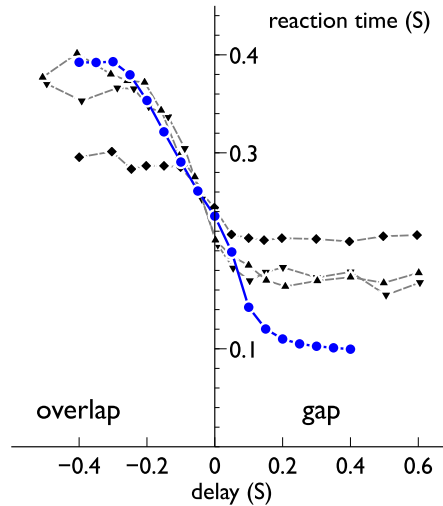

**Fig 5. The effect of delay between fixation point offset and target onset on saccadic reaction time.** The blue filled symbols and solid line show model results. The three plots with black filled symbols and dashed lines are data from experiments by [4] with three different subjects. Error bars are suppressed for clarity

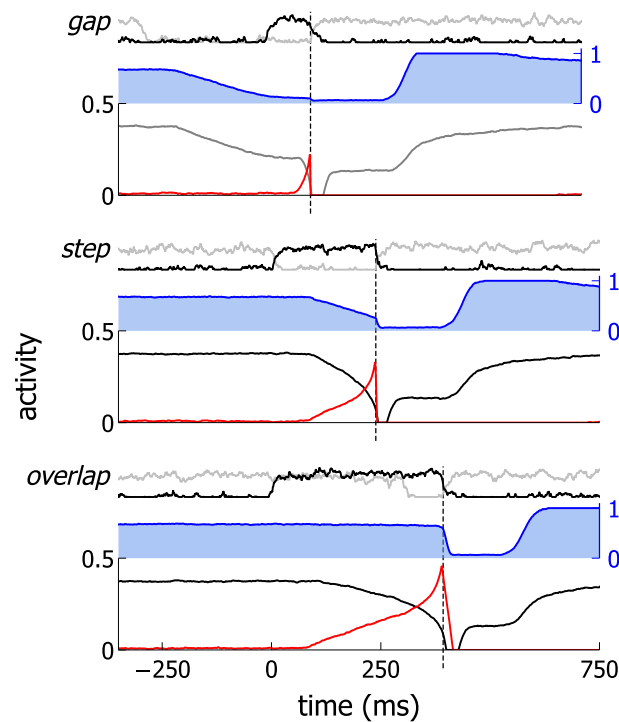

**Fig 6. Neural behaviour in the model for gap, step and overlap conditions.** Each condition contains subplots as follows: top – retinal input at fixation and target (grey and black line plots respectively); middle – STN activity at fixation ((blue line and shading); bottom – SNr and FEF activity at the target (black and red lines respectively). Graphs are aligned to target onset. The black, dashed vertical lines denote saccade onset.

---

onset occurs progressively further from this point in going from gap, to step, to overlap 455  
conditions. The key to understanding the reason for this is the STN activity. Recall 456  
that STN projections are diffuse so that STN activity originating anywhere in the 457  
retinatopic array will make itself felt everywhere else in this array. In, particular, 458  
activity in STN at fixation influences SNr activity at the target. 459

In the gap condition, activity in the STN starts to decrease as soon as fixation 460  
offsets (and before target onset). This reduces the excitatory signal to the SNr, thereby 461  
lowering the level of SNr output. By the time the target point is presented, SNr output 462  
has almost returned to its tonic level with no stimulus. The inhibition on the 463  
cortico-thalamic loop between the FEF and thalamus is, therefore, comparatively low 464  
when the target occurs. This allows the activity in the FEF-thalamic loop to 465  
accumulate rapidly, leading to a short RT. 466

In the step condition, activity at fixation in the STN does not begin to decay until a 467  
short time after the target is presented. The decrease in SNr output is therefore 468  
correspondingly delayed compared to the gap condition, leading to slower integration in 469  
the cortico-thalamic loop, and a longer RT. 470

In the overlap condition, the fixation activity in STN remains high at the target 471  
location for some time after target onset, resulting in SNr activity at the target location 472  
taking longer to decrease. This, in turn, causes a longer time for integration in the 473  
cortico-thalamic loop and thereby, longer RTs. 474

A similar reasoning may be used to explain the increased occurrence of very short 475  
latency, *express saccades* in the gap condition [3]. Thus, the relatively low inhibition at 476  
target onset from the SNr to the deep layer of SC allows activity induced in the SC 477  
superficial layer by target onset to stimulate a saccade without the persistent activity 478  
from the FEF. 479

### **3.3 Validation: the model accounts for patterns of data with 480 varying target eccentricity and luminance 481**

In [5], Kalesnykas and Hallett showed how, for the step paradigm, RT depended on the 482  
eccentricity of the target (in relation to fixation) for a range of target luminance values. 483  
We replicated this kind of experiment using eccentricities from 3 to 40 degrees. In 484

addition the same task was performed with two target stimulus luminances of 0.5 and 0.9 (on a normalised scale).

Fig 7 shows the model results, and data from the experiment with human subjects from [5]. The model results show the main features for the dependency of RT on eccentricity apparent in the data: a ‘hockey-stick’ shape with the knee of the curve at small eccentricities. In addition the decrease in RT with luminance is also shown in the model outcome, along with the preservation of the ‘hockey-stick’ trend across luminance values.

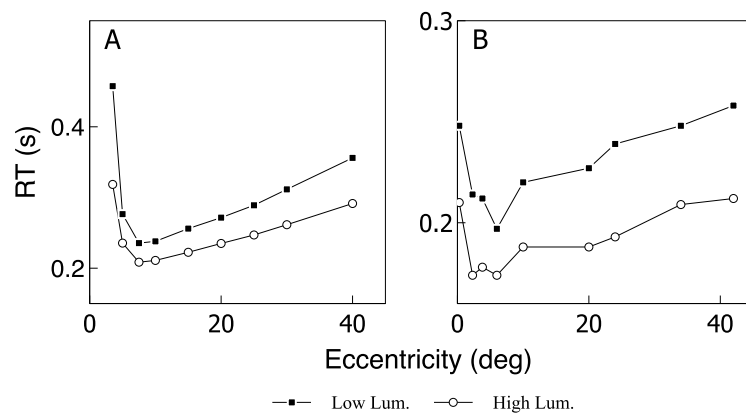

**Fig 7. RT as a function of eccentricity and luminance.** A, model results for target stimuli with luminances of 0.5 (‘Low’) and 0.9 (‘High’) on a normalised scale. B, adapted from data in [5] showing luminance 10 times and 1000 times greater than the dark-adapted foveal threshold (FT) of the subject (‘Low’ and ‘High’ luminance respectively). In both panels, the High and Low luminance values are shown by open and closed symbols respectively.

In order to explain this behaviour we examine several neural responses at a critical stage in developing the saccade (Fig 8).

The behaviour as eccentricity increases can then be explained in the model by considering the competition between two loci of activity generated by the target. The first of these is that in the striatum, which will tend to cause release of inhibition at SNr via the striato-fugal projection from SD1, thereby promoting integration in the cortico-thalamic loop with FEF. The second locus of activity is that in STN, which will tend to prevent selection by increasing activity across all channels in the SNr.

We now make a semiquantitative analysis of the contribution of each of STN and SD1, by examining the way in which ‘hills’ of activity in each nucleus interact with a topographically coincident receptive field (RF) in SNr (Fig 9).

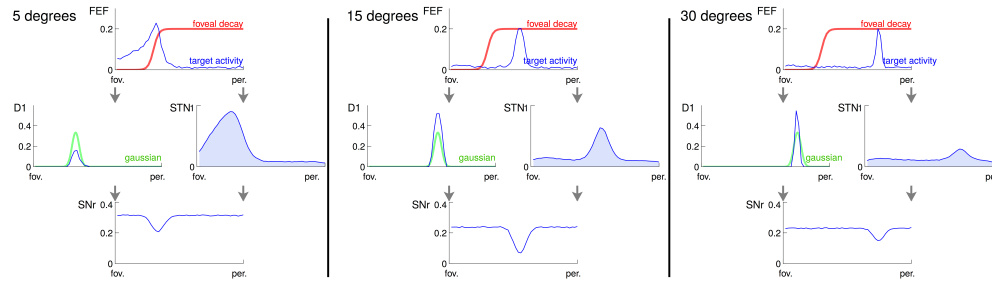

**Fig 8. Results from the model for a single time step.** This time step is chosen when the FEF activity reaches 0.2. The D2 striatal pathway is not shown for clarity. For each condition (5, 15 and 30 degree target) a cartoon of the activity in the FEF activity, striatum activity and output (top and bottom respectively), STN activity and output (top and bottom respectively), and SNr activity are shown. The effect of the reduction in weight at the fovea for striatal inputs (red), the Gaussian projective field of the striato-fugal projection (green) and summation of STN activity (blue shading) on the target activity, and consequently the SNr output are highlighted. See the text for a full explanation. fov. and per. denote the fovea and periphery of the visual field respectively.

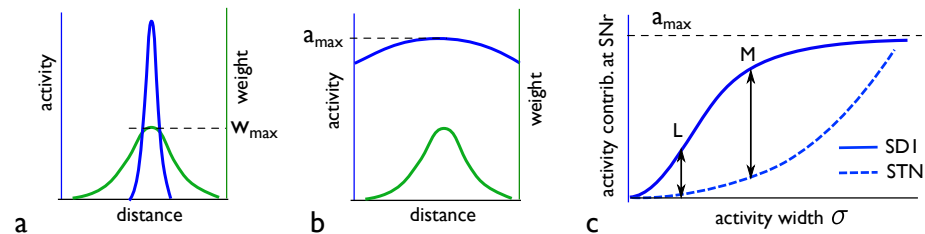

**Fig 9. Contributions to activity in SNr from SD1 and STN in the experiments of Fig 8.** a, 1D cartoon (blue line) of narrow activity profile in SD1 (a 2D ‘hill’ of activity in the model) as a function of distance across its topographic map. Also shown (in green) is the fixed weight profile for the SNr receptive field from SD1;  $w_{\max}$  is the maximum weight in this RF. b, similar to a, but with a much wider activity profile, only part of which is shown. c, semiquantitative cartoon diagram of the relative contributions to the SNr RF from SD1 (solid line) and STN (dashed line) as the width of the activity profile (governed by a parameter  $\sigma$ ) in each nucleus increases (see text). The points marked ‘L’ and ‘M’ indicate values of  $\sigma$  originating from experiments with ‘large’ and ‘moderate’ eccentricities respectively.

To proceed, assume the activity profiles are isotropic 2D Gaussian functions with width parameter  $\sigma$  (which is often a reasonably good approximation). Fig 9a shows a 1D representation of an activity ‘hill’ in SD1 with width  $\sigma_n$  that ensures the profile is much narrower than the RF weight distribution. For such a narrow profile, the weights don’t change significantly over its entire extent, and so we make the approximation that the activity is uniformly weighted by the maximum weight  $w_{\max}$  of the RF in SNr. The resulting contribution  $a_{\text{SD1}}(\sigma_n)$  to SNr activity will then be proportional to the volume under the Gaussian:  $a_{\text{SD1}}(\sigma_n) \approx kw_{\max}\sigma_n^2$ . Thus, for small  $\sigma$ ,  $a_{\text{SD1}}(\sigma_n)$  is

---

approximately quadratic in  $\sigma$  with slope  $kw_{\max}\sigma$ . 512

Now consider a much wider SD1 activity profile, with width  $\sigma_w$ , shown in Fig 9b. 513

However, we assume this has the same peak value,  $a_{\max}$ , as its narrow counterpart in 514

Fig 9a. For the wider profile we assume that the activity is approximately constant over 515

the RF, so that the contribution  $a_{\text{SD1}}(\sigma_w)$  to SNr activity is given by 516

$a_{\text{SD1}}(\sigma_w) = a_{\max} \sum_i w_i$ , where the RF is comprised of weights  $w_i$ . However, SD1 517

projections are normalised so that  $a_{\text{SD1}}(\sigma_w) \approx a_{\max}$ . From the figure it is clear that 518

$a_{\text{SD1}}(\sigma_w) > a_{\text{SD1}}(\sigma_n)$ , and so  $a_{\max}$  is an upper bound for  $a_{\text{SD1}}(\sigma)$ . Bringing these 519

observations together (for small and large  $\sigma$ ), Fig 9c shows a cartoon of  $a_{\text{SD1}}(\sigma)$  (solid 520

line). 521

We now turn to the contribution from STN which projects diffusely and uniformly 522

to SNr with weight  $w_{\text{STN}}$ . The contribution to SNr activity,  $a_{\text{STN}}$ , is therefore given by 523

$a_{\text{STN}}(\sigma) = k'w_{\text{STN}}\sigma^2$ , where  $\sigma$  is the width of the STN hill of activity and  $k'$  plays the 524

same role as  $k$  for SD1; if the STN peak activity peak is the same as that in SD1, then 525

$k' = k$ . Thus  $a_{\text{STN}}(\sigma)$  is also quadratic in  $\sigma$  and, for small values of its argument, it has 526

slope  $k'w_{\text{STN}}\sigma$ . 527

The preceding analyses may now be combined to compare the contributions  $a_{\text{STN}}(\sigma)$  528

from STN, and  $a_{\text{SD1}}(\sigma)$  from SD1 to SNr activity. While the sum of the weights 529

projecting to an SNr neuron is 2.4 and that for SD1 projection is 1, the much larger RF 530

with respect to the diffuse projection from STN means that  $w_{\text{STN}} \ll w_{\max}$ . Thus, unless 531

$k \ll k'$ , then for small  $\sigma$  where the quadratic approximation for SD1 holds, the slope of 532

$a_{\text{SD1}}(\sigma)$  is much less than its STN counterpart. Further, while the slope of  $a_{\text{STN}}(\sigma)$  is 533

monotonically increasing,  $a_{\text{STN}}(\sigma)$  itself will only reach the level of  $a_{\text{SD1}}(\sigma)$  beyond the 534

quadratic regime (see Fig 9c ) so for a significant range of  $\sigma$ ,  $a_{\text{STN}}(\sigma) < a_{\text{SD1}}(\sigma)$ . 535

Returning to Fig 8, consider the activity profiles for 30 degrees eccentricity. The 536

activity in FEF is transmitted faithfully to the BG as the cortico-striatal weights do not 537

diminish (due to the foveal reduction) at this distance. However, the activity in FEF 538

occupies a rather small part of the neural layer as the input is topographically arranged 539

with substantially more resources at the fovea. This results in a correspondingly narrow 540

zone of activity in striatum and so, with respect to Fig 9c,  $\sigma$  is relatively small; we 541

assume it occupies point typified by 'L' therein. 542

Now consider the case of 15 degrees eccentricity in Fig 8. The (faithfully 543



---

transmitted) FEF activity now occupies a larger area of the neural layer than it did for 544  
the case of 30 degrees, resulting in a wider ‘hill’ of activity in striatum and STN. Thus, 545  
in Fig 8,  $\sigma$  is greater than it was at the eccentricity of 30 degrees and we assume it 546  
occupies a point typified by ‘M’ therein. The relative influence of SD1 compared to 547  
STN is larger here than it is at the point ‘L’ (indicative of the 30 degree eccentricity), 548  
which accounts for the increased inhibition at SNr. This, in turn, causes a faster rate of 549  
accumulation in the cortico-thalamic loop leading to a smaller RT (see Fig 7). 550

When the target is at the 5 degree eccentricity, the horizontal extent of the hill of 551  
target-related activity in FEF is wider still. Thus, in Fig 9c, a corresponding  $\sigma$  would 552  
be to the right of its value at ‘M’. This may result in a larger difference between SD1 553  
and STN than that for larger eccentricities (such as 15 degrees) but, this is not 554  
guaranteed. However, there is a potentially more profound influence at work here which 555  
was not in play for the 15 and 30 degree targets; that is, the activity of the target 556  
partially overlaps with the weakened zone of cortico-striatal and thalamo-striatal 557  
weights at the fovea (see the red line in Fig 8). This results in a decrease in the Striatal 558  
inhibition of SNr (in comparison with the 15 and 30 degree targets), and therefore a 559  
corresponding decrease in the rate of accumulation in the cortico-thalamic loop, 560  
resulting in an increase in RT at low eccentricity seen in Fig 7. 561

The reduction in RT due to increasing luminance of the target point seen in Fig 7 is 562  
produced in the model by the increased peak height of the persistent luminance signal 563  
into the FEF. The higher signal strength means that integration in the cortico-thalamic 564  
loop proceeds faster than with a weaker signal, thus leading to disinhibition of the SC 565  
and the generation of a saccade in a shorter time from the target onset. 566

These experiments highlight two main mechanisms in the model which can affect the 567  
RT of a saccade. The first is the competition between inhibition and excitation to SNr 568  
from SD1 and STN respectively. This, in turn, relies on two factors: (i) a complex 569  
interplay between the projective fields from SD1/STN to SNr, and the activity profiles 570  
in the former induced by FEF; (ii) the way in which FEF-induced activity in striatum 571  
depends on the weight roll-off towards the fovea. The second major mechanism is the 572  
strength, or salience, of the target input to the FEF, which leads to increased 573  
disinhibition at the target location with increased target luminance or size and thus 574  
decreased RT. It is the balance between these opposing mechanisms which creates the 575

‘hockey-stick’ relationship between eccentricity and RT. 576

### 3.4 Validation: the model can account for increased ‘saccade averaging’ 577

In the experimental protocol investigated here, the fixation point is extinguished and 579  
two targets are presented with equal luminance. They are located an equal distance 580  
from the fixation point, but at angular separation  $\alpha$  and RTs are measured as a 581  
function  $\alpha$  [6]. The value of  $\alpha$  is varied to 30, 60 and 90 degrees and the timing is such 582  
that there is no delay between fixation offset and target onset (a step paradigm). The 583  
task is to saccade to either target. There is therefore a competition between the them, 584  
posing a genuine action selection problem. 585

Typically saccades are either to the individual targets or somewhere in-between in 586  
which case it is deemed to be an example of *saccade averaging*. More precisely, the 587  
metric used to report the results is the percentage of saccades outside the 95% 588  
confidence interval of the positions found when single targets were used [6]. Fig 10 shows 589  
examples of data from [6] together with the results of the simulation of this experiment 590  
using the same metric. There is good agreement between the model and the data. 591

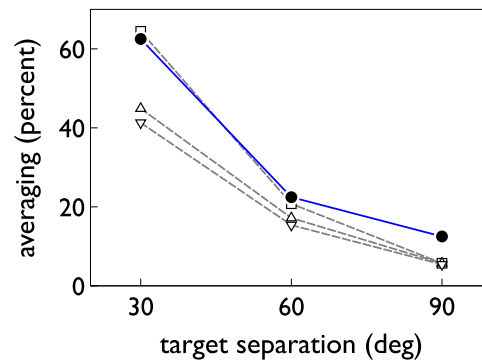

**Fig 10. Saccade averaging: data and model.** The open symbols and grey dashed lines show the results from three different primate subjects in experiments conducted by Chou et al [6]. The solid symbols and blue line is the result from the model.

An explanation of the phenomenon of saccade averaging is found in the model by 592  
invoking the finite width of the receptive fields in the BG. In the thalamocortical loop, 593

this causes both targets to build up ‘hills’ of activity across the retinotopy of their 594  
neural layers. As the distance between the targets decreases these hills begin to overlap 595  
and interact. The precise outcome of this interaction is noise dependent and results in 596  
one of three possibilities: (i) amalgamation of the activity hills for each target into a 597  
single hill associated with a location between the two targets; (ii) two distinct hills of 598  
activity in which the competition between the two targets has failed to resolve in favour 599  
of one of them; (iii) a single hill of activity associated with a single target, arising from 600  
complete and successful inter-target competition. Cases (i) and (ii) will give rise to 601  
average saccades. Some typical examples are shown in Fig 11. 602

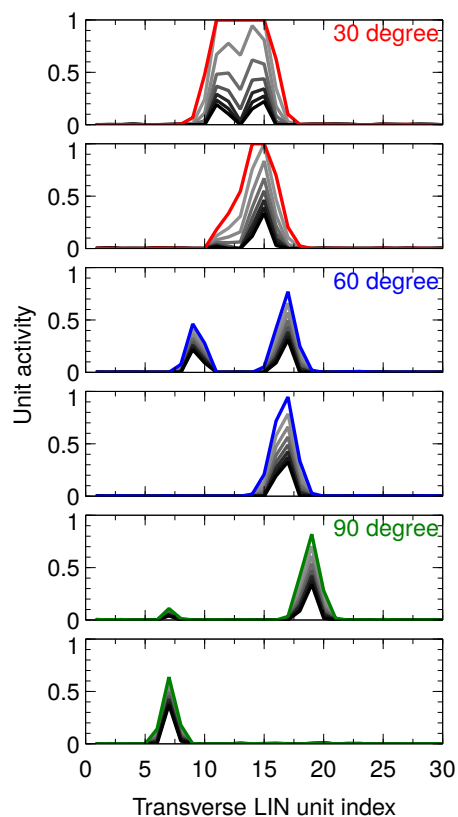

**Fig 11. Explanation of saccade averaging.** Each panel shows the time course of activity in the deep layer of SC in a saccade averaging experiment. Activity is shown for a set of neurons (indexed along the  $x$ -axis) along a line in the retinotopic array encompassing the two targets. The heavy black line is an early activity profile, lighter grey lines show snapshots at later times, and the final profile is indicated in colour for each of three target pair separations –  $30^\circ$ ,  $60^\circ$ ,  $90^\circ$ . For each target separation, two instances are shown. The upper panel of each instance-pair shows the case when the hills of activity become merged ( $30^\circ$  only) or competitively unresolved (two hills remain). The lower panel of each pair shows the case when only one hill of activity remains after successful competition between the target stimuli.

---

For an inter-target distance of  $90^\circ$ , there are few instances of (ii) and, when the do  
occur the spurious activity hill is very small so that the average position is not very far  
from that indicated by the dominant hill of activity. For  $60^\circ$ , the consequences of  
averaging are more substantial, while at  $30^\circ$  this is the main outcome.

### 3.5 Validation: the distribution of saccadic reaction times

The distributions of saccadic RTs are highly variable and can include unimodal  
distributions, and multimodal distributions exhibiting several peaks [3, 87–89]. In  
reporting these variations, there are two experimental manipulations which often occur.  
First, the gap, step and overlap paradigms are contrasted, and typically, there is a  
decrease in RT in the gap paradigm compared with the step and overlap variants [90].  
Second, under extended testing over many blocks of trials, subjects often show the  
ability to increase their performance (smaller RT) over several blocks (especially if they  
are initially naive to the task) [91]. In both cases the smaller RT is often associated  
with a new, short latency mode or peak in the response distribution at around  
100-130ms. The saccades comprising this peak are termed *express saccades*. Saccades  
contributing to the peaks at higher RTs are termed *regular saccades*. There is, however,  
large individual difference between participants. Some show clear multimodal RT  
distributions [87, 89], while others show no discernible multimodality [92, 93].

We hypothesised that the separate model loops dealing with phasic and persistent  
information could represent the different modes of saccadic production; that is, the  
loops involving SC and FEF enable express and regular saccades, respectively. To  
investigate this, we performed manipulations to the model to alternately lesion these  
loops. To lesion the phasic loop we removed the connection from the retina to the SC,  
and to lesion the tonic loop we remove the connection from the world to the FEF.

The presence of two distinct pathways with characteristic processing times matching  
the two saccadic modalities could also provide an explanation for the generation of an  
express saccade peak through training. Thus, in the saccade task, rapid saccades to  
small phasic onsets are strongly rewarded and, given large blocks of repeated trials, we  
propose that the neural circuitry will adapt to prioritise the more timely phasic  
information over the slower and redundant tonic information. We model this effect here

by increasing the weight from the model's phasic processing retinal layer to the superficial layer of SC, thus increasing the strength of phasic input to selection. 633 634

We ran experiments with the step and gap paradigms similar to those described 635 earlier; the gap variant had a fixation-target interval of 100ms (step has 0ms). To 636 investigate training, experiments were conducted in two blocks of 800 trials and, 637 between blocks, the weight between the retina and SC-superficial populations was 638 increased from 1.0 to 3.0. The results for all four conditions, showing the distribution of 639 saccades against RT, are shown in Fig 12. 640

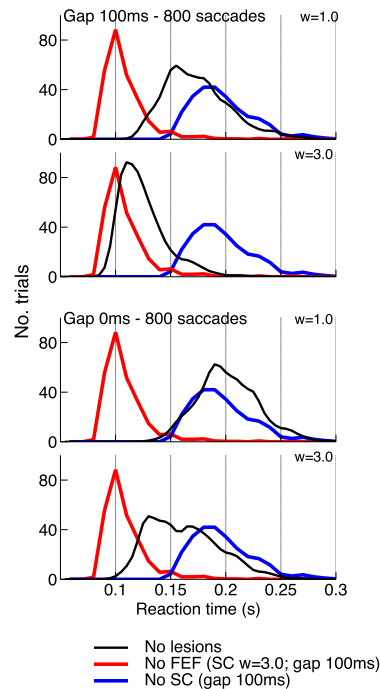

**Fig 12. The distribution of saccades generated by the model for several conditions.** The red line shows results with lesioned FEF, a gap of 100ms and retina-collicular weight,  $w$ , of 3.0. The blue line is for a gap of 100ms but no SC. The black line shows the unlesioned results for the conditions indicated in each panel.

There are, as predicted, two distinct modes of performance associated with each 641 lesion. With lesioned FEF, the model used the 'phasic-only' loop (involving SC) and 642 gave a peak RT around 100ms, consistent with express saccades. In contrast the 643 'tonic-only' model with lesioned SC (which relied on FEF) gave a peak around 170ms, 644 indicating regular saccades. 645

For the gap paradigm, increasing the strength of the phasic retinal input leads to a 646 shift in the RT distribution from regular saccades to express saccades. For the step 647

---

paradigm (gap = 0ms) there is also a shift towards lower RT, however there are much fewer saccades within the express saccade region than with the gap paradigm.

We have shown that the phasic and persistent pathways in the model produce different distributions of saccades that match the RT distributions of express and regular saccades respectively. This agrees with previous explanations of RT distributions that invoked multiple pathways (e.g. [88]). However, in contrast to these earlier models which use abstract functional pathways, our model is grounded in the anatomy and was not constructed to describe express and regular saccades *per se*; these emerge from candidate pathways that occur naturally in the architecture. (There is evidence for a third, slower pathway involving a loop through the prefrontal cortex, or through the ventral stream of the visual system, but this is beyond the scope of our current model).

Despite these distinct pathways, we do not find a multimodal distribution of saccades in the unlesioned model. This is not surprising, however, as 60% of recorded data sets found by Gezeck et al [89] showed no bimodality in their analysis. It is therefore possible that the individual differences shown in experimental subjects can be explained by manipulations to the weights in the model, however such an analysis is beyond the scope of this paper.

The failure to generate many express saccades in the step condition matches experimental findings, and in our model can be explained using the same mechanism invoked to account for the relative increase in RT in the the step condition (compared to the gap condition). After the fixation point is removed, activity related to fixation still exists in the STN, and this activity decreases the rate with which activity in the cortico-thalamic loop can build and generate a saccade. This results in the suppression of express saccades for the step condition.

## 4 Discussion

In this paper we present the integration of an existing biologically plausible model of the Basal Ganglia into a complete sensorimotor system governing saccadic eye movements. Previously such integrated models have been used to investigate voluntary tasks, such as memory guided saccades [13]. With this model we instead focus on investigating the accuracy with which an integrated BG system can reproduce a suite of

---

reflexive saccadic experimental paradigms. The resulting model of the oculomotor 678  
system is able to reproduce several observed reflexive saccadic oculomotor behaviours, 679  
despite only having been tuned to reproduce simple saccadic step-paradigm behaviour 680  
and neurophysiological traces. Moreover, the model is able to provide explanations for 681  
these behaviours in terms of the propagation and processing of signals in key brain 682  
structures, consistent with electrophysiological data. 683

The model is fairly complex, with many structures and several feedback loops. 684  
However, the explanation of some of the behavioural phenomena (such as the 685  
'hockey-stick' for RT against eccentricity) rely on a complex interplay between several 686  
mechanism that would not be available in a simpler model. Thus, while we don't claim 687  
that we have accounted for all contributory mechanisms to all examined phenomena, we 688  
do argue that some of these phenomena are intrinsically complex, and require a minimal 689  
anatomical veracity to account for them properly. These models should then be treated 690  
as 'in silico preparations' which can be continuously 'mined' for explanatory power. 691

Our model is based on a well established anatomical and neurophysiological 692  
architecture, however it is pertinent to compare the explanatory power of our model 693  
with that of more abstract models of reflexive saccadic eye movements that can be 694  
found in the literature. Influenced by field concepts in physics, the dynamic field theory 695  
of movement preparation as described by [94], is a theoretical framework that was 696  
devised to explore the generation and modulation of motor signals in the brain. The 697  
theory posits that movement parameters are encoded by an activation field that is 698  
spatially distributed over some computational space. Under this scheme, both the input 699  
supplied to the space, and local dynamic interactions within it, act to shape the 700  
evolution of the activation fields and the movements they give rise to. It is no 701  
coincidence that this view of action generation maps naturally onto the spatial maps 702  
observed within the superior colliculus (and other oculomotor structures). 703

The models of Klaus Kopecz [95, 96] and [97] attempt to represent the saccadic 704  
system as a dynamic field model. The most biologically constrained of these is the 705  
model of [97] in which the buildup and burst cells of the intermediate SC are modelled 706  
as distinct dynamic fields and attempts are made to fit the time course of neural 707  
activity observed in primates performing oculomotor tasks. This model provides 708  
insights into a number of phenomena affecting saccadic reaction times, including the 709

---

step, gap and overlap effects and the effect of distractors i.e. multiple simultaneous 710  
target stimuli. Furthermore, by making assumptions about endogenous signals supplied 711  
to the intermediate SC during voluntary paradigms, the authors are also able to 712  
reproduce reaction time effects associated with the anti-saccade paradigm, and with 713  
varying target probabilities. 714

It is impressive that the relatively simple model of [97] and similar dynamic field 715  
models, are able to reproduce such a rich set of saccadic phenomena. The 716  
computational principles invoked to explain RT effects in such models are the same as 717  
those found in the model presented here, namely that spatially distributed population 718  
codes that have a tendency to persist, can cooperate or compete depending on their 719  
location in their embedding space, and that this competition can affect both the time 720  
taken for a movement to be initiated, and its resultant metrics. 721

Despite this, these models are rather abstract in nature because, in so far as they 722  
attempt to capture results that are demonstrably reliant on brain areas outside of the 723  
SC, it is clear that they can, at best, only do so at a coarse grained level of description. 724  
This contrasts with the model presented in this article, which is heavily constrained by 725  
the results of anatomical and physiological experiments, and provides explanations 726  
which are wholly tied to the biology. For example, it is difficult to see the results related 727  
to saccade reaction time distribution emerging from a simple model of SC, as they do 728  
from the model presented here. 729

While our model accounts for a range of saccadic behaviours and physiological 730  
signatures it does not account for the phenomena of voluntary saccades or learning. For 731  
this we would need to integrate the competencies shown in existing models [13]. Our 732  
model does, however, highlight the continued power of the GPR basal ganglia model, 733  
demonstrating the ability of the model, as part of an extended system, to replicate both 734  
qualitatively and quantitatively a wide range of reflexive saccadic experimental 735  
paradigms. Such validation supports future work in integrating the GPR model as the 736  
decision making basis of more complex models of the primate brain. 737



---

## References

1. Findlay J, Walker R. Human saccadic eye movements. *Scholarpedia*. 2012;7(7):5095. doi:10.4249/scholarpedia.5095.
2. Edwards W. *Motor learning and control: From theory to practice*. Cengage Learning; 2010.
3. Fischer B, Weber H. Express saccades and visual attention. *Behav Brain Sci*. 1993;16(03):553–567.
4. Reulen JPH. Latency of visually evoked saccadic eye movements. *Biol Cybern*. 1984;50(4):251–262. doi:10.1007/BF00337075.
5. Kalesnykas RP, Hallett PE. Retinal eccentricity and the latency of eye saccades. *Vision Res*. 1994;34(4):517–531.
6. Chou Ih, Sommer MA, Schiller PH. Express averaging saccades in monkeys. *Vision Res*. 1999;39(25):4200–4216. doi:10.1016/S0042-6989(99)00133-9.
7. Büttner-Ennever JA, Horn AKE. Anatomical substrates of oculomotor control. *Curr Opin Neurobiol*. 1997;7(6):872–879.
8. Munoz DP. Commentary: saccadic eye movements: overview of neural circuitry. *Prog Brain Res*. 2002;140:89–96.
9. Johnston K, Everling S. Neurophysiology and neuroanatomy of reflexive and voluntary saccades in non-human primates. *Brain Cogn*. 2008;68(3):271–283. doi:10.1016/j.bandc.2008.08.017.
10. Redgrave P, Prescott TJ, Gurney K. The basal ganglia: A vertebrate solution to the selection problem? *Neuroscience*. 1999;89:1009–1023.
11. Gurney K, Prescott TJ, Redgrave P. A computational model of action selection in the basal ganglia. I. A new functional anatomy. *Biol Cybern*. 2001;84:401–410.
12. Gurney K, Prescott TJ, Redgrave P. A computational model of action selection in the basal ganglia. II. Analysis and simulation of behaviour. *Biol Cybern*. 2001;84:411–423.

- 
13. N'Guyen S, Thurat C, Girard BA. Saccade learning with concurrent cortical and subcortical basal ganglia loops. *Front Comput Neurosci.* 2014;8:48. doi:10.3389/fncom.2014.00048.
  14. Hikosaka O, Takikawa Y, Kawagoe R. Role of the basal ganglia in the control of purposive saccadic eye movements. *Physiol Rev.* 2000;80(3):953–978.
  15. Alexander GE, DeLong MR, Strick PL. Parallel organization of functionally segregated circuits linking basal ganglia and cortex. *Annu Rev Neurosci.* 1986;9:357–381.
  16. Parent A, Hazrati LN. Functional anatomy of the basal ganglia .1. the cortico-basal ganglia-thalamo-cortical loop. *Brain Res Rev.* 1995;20:91–127.
  17. Middleton FA, Strick PL. Basal ganglia and cerebellar loops: motor and cognitive circuits. *Brain Res Rev.* 2000;(31):236–250.
  18. McHaffie JG, Stanford TR, Stein BE, Coizet V, Redgrave P. Subcortical loops through the basal ganglia. *Trends Neurosci.* 2005;28(8):401–407. doi:10.1016/j.tins.2005.06.006.
  19. Chevalier G, Deniau JM. Disinhibition as a basic process in the expression of striatal functions. *Trends Neurosci.* 1990;13(7):277–280.
  20. Humphries MD, Gurney KN. The role of intra-thalamic and thalamocortical circuits in action selection. *Netw Comput Neural Syst.* 2002;13:131–156.
  21. Huerta MF, Krubitzer LA, Kaas JH. Frontal eye field as defined by intracortical microstimulation in squirrel monkeys, owl monkeys, and macaque monkeys: I. Subcortical connections. *J Comp Neurol.* 1986;253(4):415–439. doi:10.1002/cne.902530402.
  22. Segraves MA, Goldberg ME. Functional properties of corticotectal neurons in the monkey's frontal eye field. *J Neurophysiol.* 1987;58(6):1387–1419.
  23. Hanes DP, Wurtz RH. Interaction of the Frontal Eye Field and Superior Colliculus for Saccade Generation. *J Neurophysiol.* 2001;85(2):804–815.

- 
24. Schlag J, Schlag-Rey M. Evidence for a supplementary eye field. *J Neurophysiol.* 1987;57(1):179–200. 792  
793
25. Tehovnik EJ, Sommer MA, Chou IH, Slocum WM, Schiller PH. Eye fields in the 794  
frontal lobes of primates. *Brain Res Rev.* 2000;32(2-3):413–448. 795  
doi:10.1016/S0165-0173(99)00092-2. 796
26. Chen LL, Wise SP. Supplementary eye field contrasted with the frontal eye field 797  
during acquisition of conditional oculomotor associations. *J Neurophysiol.* 798  
1995;73(3):1122–1134. 799
27. Schlag JD. Neurons that program what to do and in what order. *Neuron.* 800  
2002;34(2):177–178. 801
28. Lu X, Matsuzawa M, Hikosaka O. A neural correlate of oculomotor sequences in 802  
supplementary eye field. *Neuron.* 2002;34(2):317–325. 803
29. Gaymard B, Ploner CJ, Rivaud S, Vermersch AI, Pierrot-Deseilligny C. Cortical 804  
control of saccades. *Exp Brain Res.* 1998;123(1-2):159–163. 805  
doi:10.1007/s002210050557. 806
30. Arbib MA. Introducing the neuron. In: *Handb. Brain Theory Neural Networks.* 807  
Cambridge Mass.: {MIT} Press; 1995. p. 4–11. 808
31. Wilson CJ, Weyrick A, Terman D, Hallworth NE, Bevan MD. A model of reverse 809  
spike frequency adaptation and repetitive firing of subthalamic nucleus neurons. 810  
*J Neurophysiol.* 2004;91(5):1963–1980. 811
32. Mink JW. The basal ganglia: focused selection and inhibition of competing 812  
motor programs. *Prog Neurobiol.* 1996;50(4):381–425. 813
33. Wickens J. Basal ganglia: structure and computations. *Netw Comput Neural* 814  
*Syst.* 1997;8(4):77–109. 815
34. Bolam JP, Hanley JJ, Booth PA, Bevan MD. Synaptic organisation of the basal 816  
ganglia. *J Anat.* 2000;196:527–542. 817

- 
35. Gerfen CR, Engbar TM, Mahan LC, Susel Z, Chase TN, Monsma FJ, et al. D1 and D2 dopamine receptor regulated gene-expression of striatonigral and striatopallidal neurons. *Science* (80- ). 1990;250:1429–1432.
36. Parent A, Hazrati LN. Anatomical aspects of information processing in primate basal ganglia. *Trends Neurosci.* 1993;16:111–116.
37. Mink JW, Thach WT. Basal ganglia intrinsic circuits and their role in behavior. *Curr Opin Neurobiol.* 1993;3(6):950–957.
38. DeLong MR, Crutcher MD, Georgopoulos AP. Primate globus pallidus and subthalamic nucleus: functional organization. *J Neurophysiology.* 1985;53:530–543.
39. Kita H, Kitai ST. Intracellular study of rat globus pallidus neurons: membrane properties and responses to neostriatal, subthalamic and nigral stimulation. *Brain Res.* 1991;564(2):296–305.
40. Wilson CJ, Kawaguchi Y. The origins of the two-state spontaneous membrane potential fluctuations of neostriatal spiny neurons. *J Neurosci.* 1996;16(7):2397–2410.
41. Hernández-López S, Vargas J, Surmeier DJ, Reyes A, Galarraga E. D1 receptor activation enhances evoked discharge in neostriatal medium spiny neurons by modulating an L-type Ca<sup>2+</sup> conductance. *J Neurosci.* 1997;17(9):3334–42.
42. Gonon F. Prolonged and extrasynaptic excitatory action of dopamine mediated by D1 receptors in the rat striatum in vivo. *J Neurosci.* 1997;17(15):5972–8.
43. Delgado A, Sierra A, Querejeta E, Valdiosera RF, Aceves J. Inhibitory control of the GABAergic transmission in the rat neostriatum by D2 dopamine receptors. *Neuroscience.* 1999;95(4):1043–1048. doi:10.1016/S0306-4522(99)00495-9.
44. Robinson DA, Fuchs AF. Eye movements evoked by stimulation of frontal eye fields. *J Neurophysiol.* 1969;32(5):637–648.
45. Bruce CJ, Goldberg ME, Bushnell MC, Stanton GB. Primate frontal eye fields. II. Physiological and anatomical correlates of electrically evoked eye movements. *J Neurophysiol.* 1985;54(3):714–734.

- 
46. Sabes PN, Breznen B, Andersen RA. Parietal representation of object-based saccades. *J Neurophysiol.* 2002;88(4):1815–1829. 846  
847
47. Thompson KG, Bichot NP. A visual salience map in the primate frontal eye field. *Dev Dyn Pathol Neuronal Networks From Mol to Funct Circuits.* 2005;147:251–262. 848  
849  
850
48. Schall JD, Hanes DP, Thompson KG, King DJ. Saccade target selection in frontal eye field of macaque .1. Visual and premovement activation. *J Neurosci.* 1995;15:6905–6918. 851  
852  
853
49. Monosov IE, Trageser JC, Thompson KG. Measurements of simultaneously recorded spiking activity and local field potentials suggest that spatial selection emerges in the frontal eye field. *Neuron.* 2008;57:614–625. 854  
855  
856
50. Cohen JY, Heitz RP, Woodman GF, Schall JD. Neural basis of the set-size effect in frontal eye field: timing of attention during visual search. *J Neurophysiol.* 2009;101(4):1699–1704. doi:10.1152/jn.00035.2009. 857  
858  
859
51. Thompson KG, Bichot NP, Sato TR. Frontal eye field activity before visual search errors reveals the integration of bottom-up and top-down salience. *J Neurophysiol.* 2005;93:337–351. 860  
861  
862
52. Bichot NP, Thompson KG, Chenchal Rao S, Schall JD. Reliability of macaque frontal eye field neurons signaling saccade targets during visual search. *J Neurosci.* 2001;21(2):713–725. 863  
864  
865
53. Ungerleider LG, Mishkin M. Two cortical visual systems. In: *In Analysis of Visual Behavior*, ed. DJ Ingle, MA Goodale, RJW Mansfield. Cambridge, MA: MIT Press; 1982. p. 549–586. 866  
867  
868
54. Saint-Cyr JA, Ungerleider LG, Desimone R. Organization of visual cortical inputs to the striatum and subsequent outputs to the pallidonigral complex in the monkey. *J Comp Neurol.* 1990;298:129–156. 869  
870  
871
55. Lynch JC, Hoover JE, Strick PL. Input to the primate frontal eye field from the substantia nigra, superior colliculus, and dentate nucleus demonstrated by transneuronal transport. *Exp Brain Res.* 1994;100(1):181–186. 872  
873  
874
-

- 
56. McFarland NR, Haber SN. Thalamic relay nuclei of the basal ganglia form both 875  
reciprocal and nonreciprocal cortical connections, linking multiple frontal cortical 876  
areas. *J Neurosci.* 2002;22(18):8117–8132. 877
57. Chambers JM, Gurney K, Humphries M, Prescott A. Mechanisms of choice in 878  
the primate brain: a quick look at positive feedback. In: *Model. Nat. Action Sel.* 879  
Cambridge University Press; 2012. p. 390–420. 880
58. Cope A, Gurney KN. A biologically based model of active vision. In: O’Keefe S, 881  
Kazakov, D , Tsoulas, D , editors. *Proc. {AISB}’11 - Archit. Act. Vis. York,* 882  
{UK}; 2011. p. 13–20. Available from: 883  
<http://www.aisb.org.uk/publications/proceedings/aisb2011.zip>. 884
59. Kultas-Ilinsky K, Ilinsky IA, Massopust LC, Young PA, Smith KR. 885  
Nigrothalamic pathway in the cat demonstrated by autoradiography and electron 886  
microscopy. *Exp Brain Res.* 1978;33(3-4):481–492. doi:10.1007/BF00235569. 887
60. Mehaffey WH, Doiron B, Maler L, Turner RW. Deterministic Multiplicative Gain 888  
Control with Active Dendrites. *J Neurosci.* 2005;25(43):9968–9977. 889  
doi:10.1523/JNEUROSCI.2682-05.2005. 890
61. Hikosaka O, Wurtz RH. Visual and oculomotor functions of monkey substantia 891  
nigra pars reticulata. IV. Relation of substantia nigra to superior colliculus. *J* 892  
*Neurophysiol.* 1983;49(5):1285–1301. 893
62. Lattin R. The effects of bilateral frontal eye-field, posterior parietal or superior 894  
collicular lesions on brightness thresholds in the rhesus monkey. 895  
*Neuropsychologia.* 1977;15(4-5):507–516. 896
63. Jayaraman A, Batton RR, Carpenter MB. Nigrotectal projections in the monkey: 897  
an autoradiographic study. *Brain Res.* 1977;135(1):147–152. 898
64. Jiang H, Stein BE, McHaffie JG. Opposing basal ganglia processes shape 899  
midbrain visuomotor activity bilaterally. *Nature.* 2003;423(6943):982–986. 900  
doi:10.1038/nature01698. 901
65. Wurtz RH, Albano JE. Visual-motor function of the primate superior colliculus. 902  
*Annu Rev Neurosci.* 1980;3:189–226. doi:10.1146/annurev.ne.03.030180.001201. 903
-

- 
66. Goldberg ME, Wurtz RH. Activity of superior colliculus in behaving monkey. I. 904  
Visual receptive fields of single neurons. *J Neurophysiol.* 1972;35(4):542–559. 905
67. Lee C, Rohrer WH, Sparks DL. Population coding of saccadic eye movements by 906  
neurons in the superior colliculus. *Nature.* 1988;332(6162):357–360. 907  
doi:10.1038/332357a0. 908
68. van Opstal AJ, van Gisbergen JA. Role of monkey superior colliculus in saccade 909  
averaging. *Exp Brain Res.* 1990;79(1):143–149. 910
69. Mays LE, Sparks DL. Dissociation of visual and saccade-related responses in 911  
superior colliculus neurons. *J Neurophysiol.* 1980;43(1):207–232. 912
70. Stanton GB, Goldberg ME, Bruce CJ. Frontal eye field efferents in the macaque 913  
monkey: I. Subcortical pathways and topography of striatal and thalamic 914  
terminal fields. *J Comp Neurol.* 1988;271(4):473–492. doi:10.1002/cne.902710402. 915
71. Sommer MA, Wurtz RH. Composition and topographic organization of signals 916  
sent from the frontal eye field to the superior colliculus. *J Neurophysiol.* 917  
2000;83(4):1979–2001. 918
72. Arai K, Keller E, Edelman J. Two-dimensional neural network model of the 919  
primate saccadic system. *Neural Networks.* 1994;7(6-7):1115. 920  
doi:10.1016/S0893-6080(05)80162-5. 921
73. Arai K, Keller EL. A model of the saccade-generating system that accounts for 922  
trajectory variations produced by competing visual stimuli. *Biol Cybern.* 923  
2005;92(1):21–37. doi:10.1007/s00422-004-0526-y. 924
74. Azzopardi P, Cowey A. Preferential representation of the fovea in the primary 925  
visual cortex. *Nature.* 1993;361(6414):719–721. doi:10.1038/361719a0. 926
75. Rovamo J, Virsu V. An estimation and application of the human cortical 927  
magnification factor. *Exp Brain Res.* 1979;37(3):495–510. 928  
doi:10.1007/BF00236819. 929
76. Slotnick SD, Klein SA, Carney T, Sutter EE. Electrophysiological estimate of 930  
human cortical magnification. *Clin Neurophysiol.* 2001;112(7):1349–1356. 931
-

- 
77. Zelinsky GJ. A theory of eye movements during target acquisition. *Psychol Rev.* 2008;115(4):787–835. doi:10.1037/a0013118. 932  
933
78. Guitton D, Crommelinck M, Roucoux A. Stimulation of the superior colliculus in the alert cat. *Exp Brain Res.* 1980;39(1). doi:10.1007/BF00237070. 934  
935
79. Paul K, Gnadt JW. Activity of omnipause neurons during "staircase saccades" elicited by persistent microstimulation of the superior colliculus. *Vision Res.* 2006;46(20):3430–42. doi:10.1016/j.visres.2006.05.014. 936  
937  
938
80. Teräväinen H, Calne DB. Studies of parkinsonian movement: 1. Programming and execution of eye movements. *Acta Neurol Scand.* 1980;62(3):137–48. 939  
940
81. Shaikh AG, Xu-Wilson M, Grill S, Zee DS. 'Staircase' square-wave jerks in early Parkinson's disease. *Br J Ophthalmol.* 2011;95(5):705–9. doi:10.1136/bjo.2010.179630. 941  
942  
943
82. Guthrie B, Porter J, Sparks D. Corollary discharge provides accurate eye position information to the oculomotor system. *Science (80- ).* 1983;221(4616):1193–1195. doi:10.1126/science.6612334. 944  
945  
946
83. Matin E. Saccadic suppression: A review and an analysis. *Psychol Bull.* 1974;81(12):899–917. doi:10.1037/h0037368. 947  
948
84. Matsumura M, Kojima J, Gardiner TW, Hikosaka O. Visual and oculomotor functions of monkey subthalamic nucleus. *J Neurophysiol.* 1992;67(6):1615–32. 949  
950
85. Hikosaka O, Sakamoto M, Usui S. Functional properties of monkey caudate neurons. II. Visual and auditory responses. *J Neurophysiol.* 1989;61(4):799–813. 951  
952
86. Bruce CJ, Goldberg ME. Primate frontal eye fields. I. Single neurons discharging before saccades. *J Neurophysiol.* 1985;53(3):603–635. 953  
954
87. Gezeck S, Timmer J. Detecting multimodality in saccadic reaction time distributions in gap and overlap tasks. *Biol Cybern.* 1998;78(4):293–305. 955  
956
88. Fischer B, Gezeck S, Huber W. The three-loop model: a neural network for the generation of saccadic reaction times. *Biol Cybern.* 1995;72(3):185–96. 957  
958
-



- 
89. Gezeck S, Fischer B, Timmer J. Saccadic reaction times: a statistical analysis of multimodal distributions. *Vision Res.* 1997;37(15):2119–31. 959 960
90. Saslow MG. Latency for saccadic eye movement. *JOSA.* 1967;57(8):1030–1033. 961
91. Fischer B, Ramsperger E. Human express saccades: effects of randomization and daily practice. *Exp Brain Res.* 1986;64(3):569–578. 962 963
92. Wenban-Smith MG, Findlay JM. Express saccades: is there a separate population in humans? *Exp brain Res.* 1991;87(1):218–22. 964 965
93. Sereno AB, Holzman PS. Express Saccades and Smooth Pursuit Eye Movement Function in Schizophrenic, Affective Disorder, and Normal Subjects. 2007;. 966 967
94. Erlhagen W, Schöner G. Dynamic field theory of movement preparation. *Psychol Rev.* 2002;109(3):545–72. 968 969
95. Kopecz K. Saccadic reaction times in gap/overlap paradigms: a model based on integration of intentional and visual information on neural, dynamic fields. *Vision Res.* 1995;35(20):2911–25. 970 971 972
96. Kopecz K, Schöner G. Saccadic motor planning by integrating visual information and pre-information on neural dynamic fields. *Biol Cybern.* 1995;73(1):49–60. 973 974
97. Trappenberg TP, Dorris MC, Munoz DP, Klein RM. A model of saccade initiation based on the competitive integration of exogenous and endogenous signals in the superior colliculus. *J Cogn Neurosci.* 2001;13(2):256–71. 975 976 977
